# Supplementary material for: Synthesis, Characterization, and Reactivity Studies of New Cyclam-Based Y(III) Complexes
Source: MDPI journal article supplement (doi:10.3390/molecules28247998), 2023-12-07
Supplement: s1 [file s1]

# Synthesis, characterization, and reactivity studies of new cyclam-based Y(III) complexes

## SUPPORTING INFORMATION

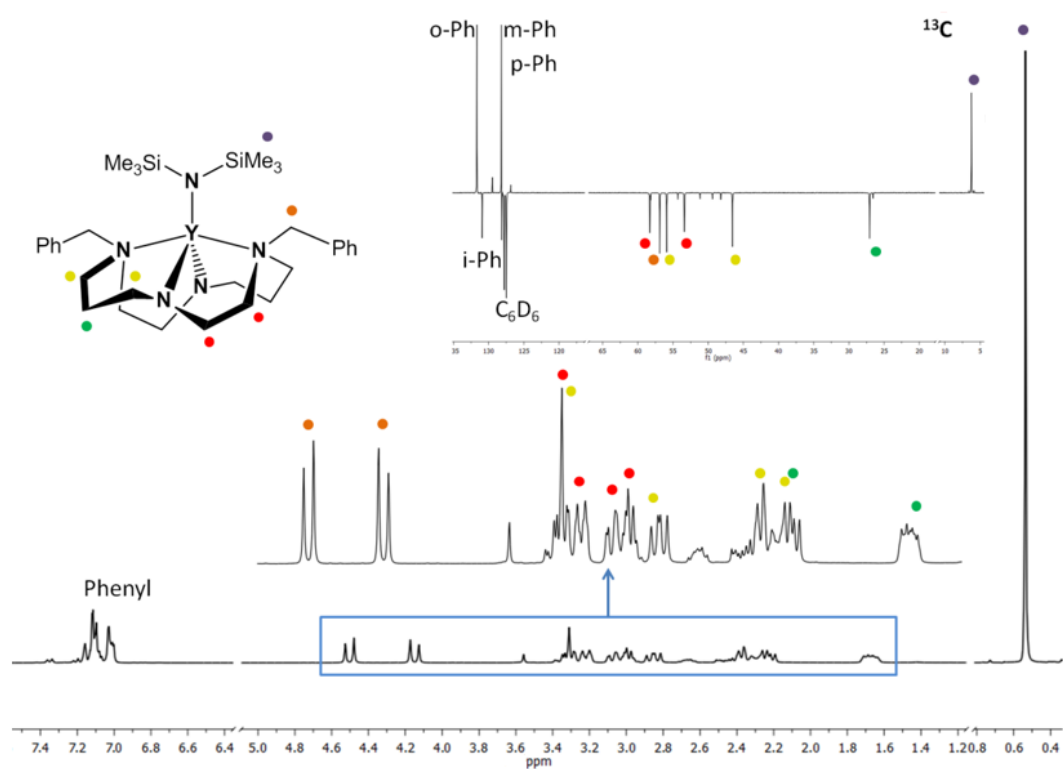

**Figure S1.**  $^1\text{H}$  NMR and  $^{13}\text{C}\{^1\text{H}\}$  APT spectra of **2** in  $\text{C}_6\text{D}_6$ . The corresponding protons and carbons are identified with coloured dots.

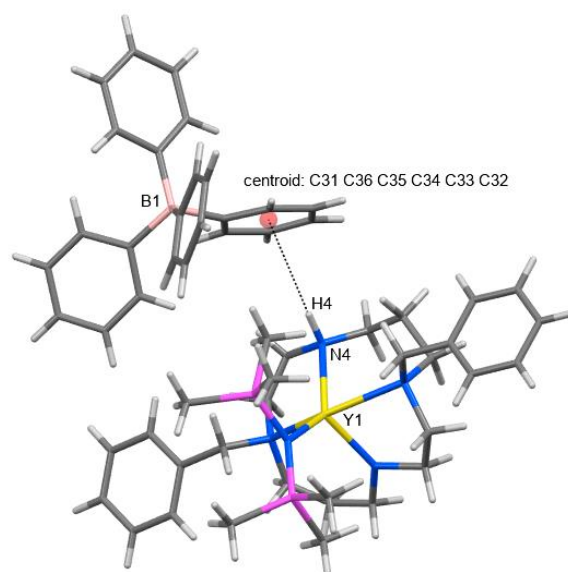

**Figure S2.** N-H $\cdots\pi$  interactions in [(HBn<sub>2</sub>Cyclam)Y(N(SiMe<sub>3</sub>)<sub>2</sub>)] [BPh<sub>4</sub>], **3**.

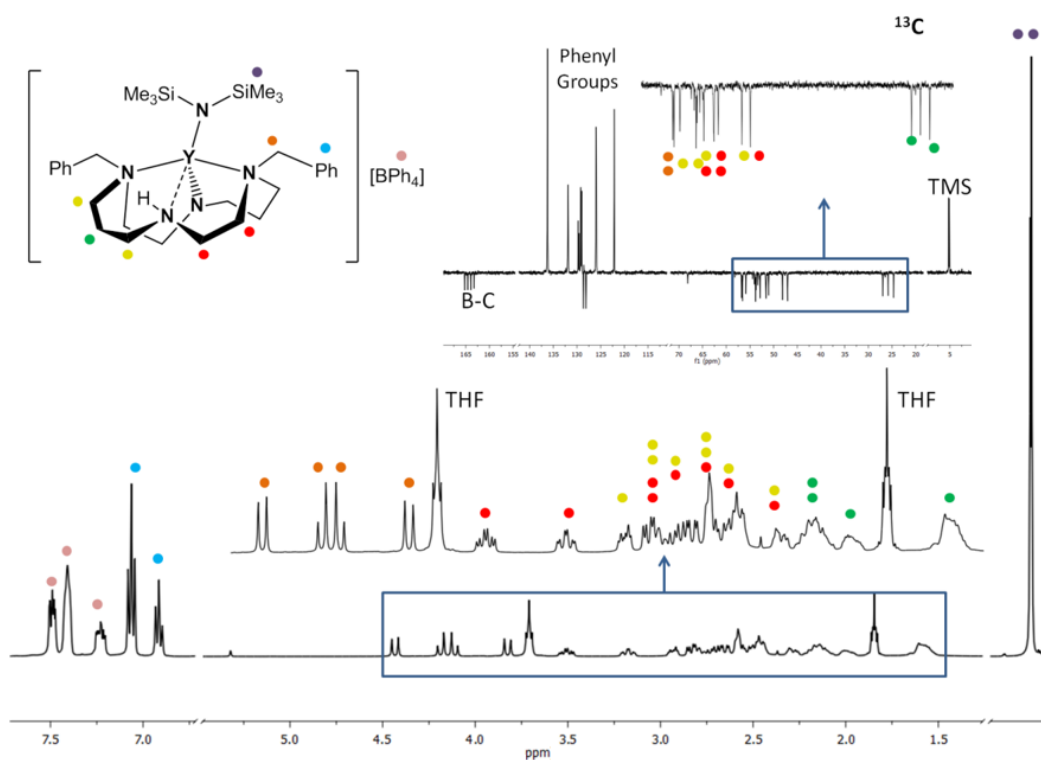

**Figure S3.** <sup>1</sup>H NMR and <sup>13</sup>C{<sup>1</sup>H} APT spectra of **3** in CD<sub>2</sub>Cl<sub>2</sub>. The corresponding protons and carbons are identified with coloured dots.

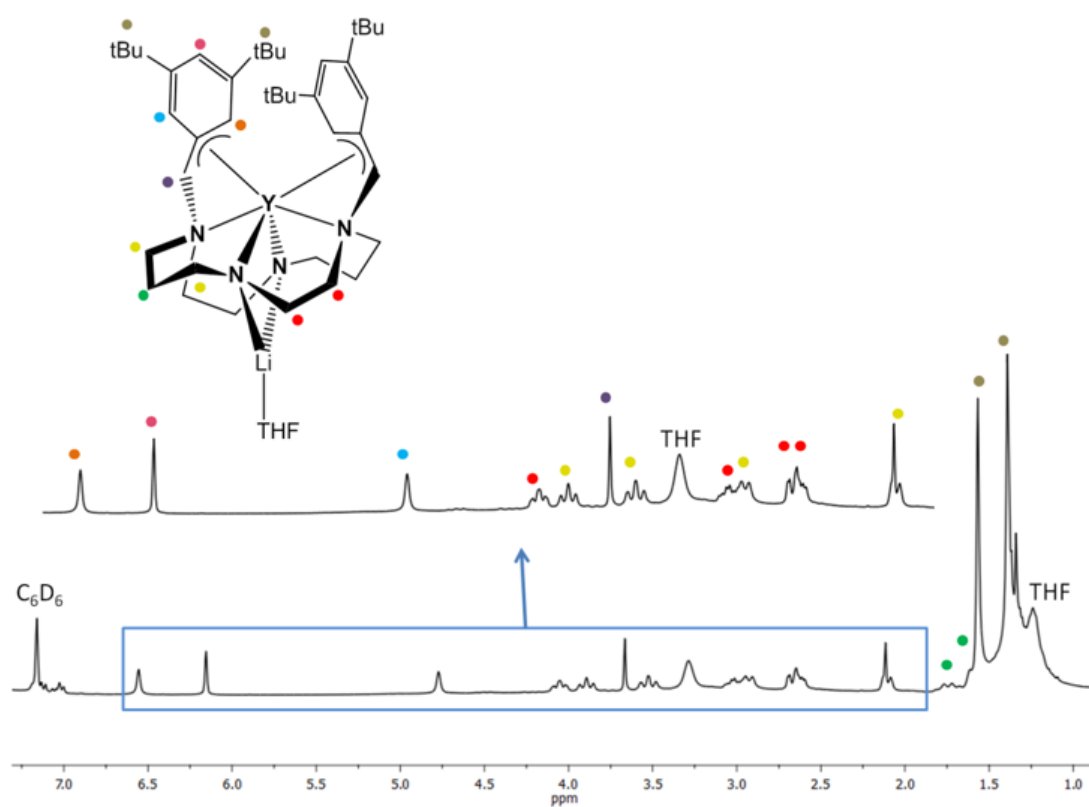

**Figure S4.**  $^1\text{H}$  NMR spectrum of **6** in  $\text{C}_6\text{D}_6$ . The corresponding protons are identified with coloured dots.

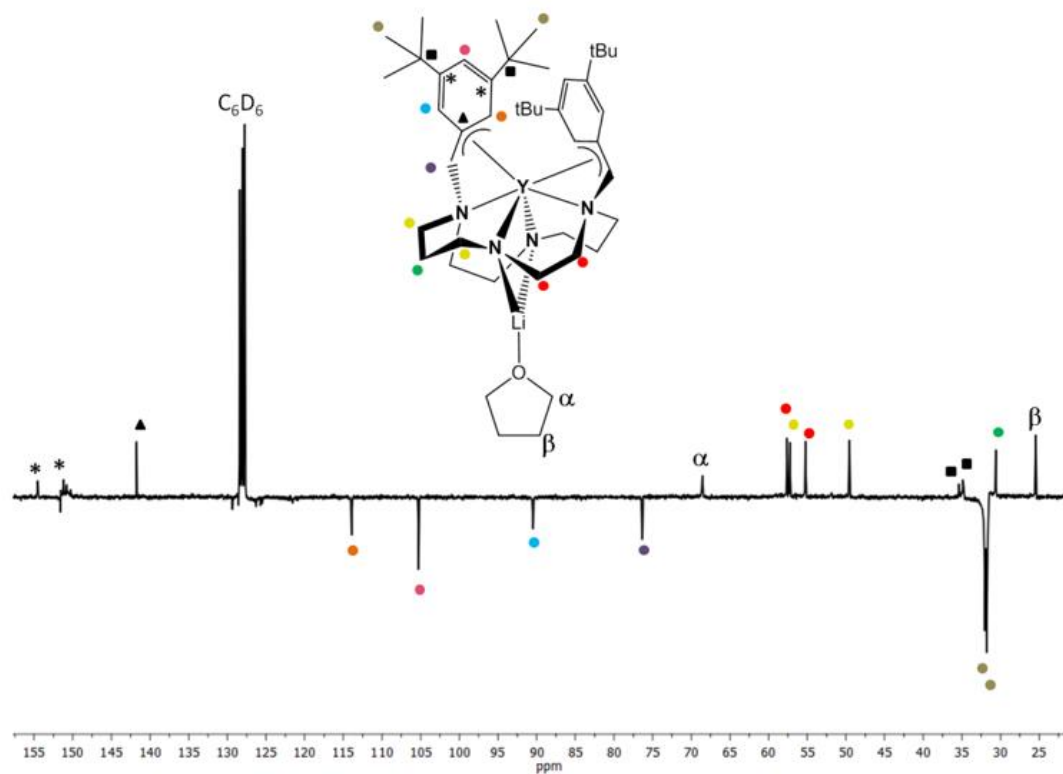

**Figure S5.**  $^{13}\text{C}\{^1\text{H}\}$  APT NMR spectrum of **6** in  $\text{C}_6\text{D}_6$ . The corresponding carbons are identified with coloured dots, asterisks (\*), squares (■) and triangles (▲).

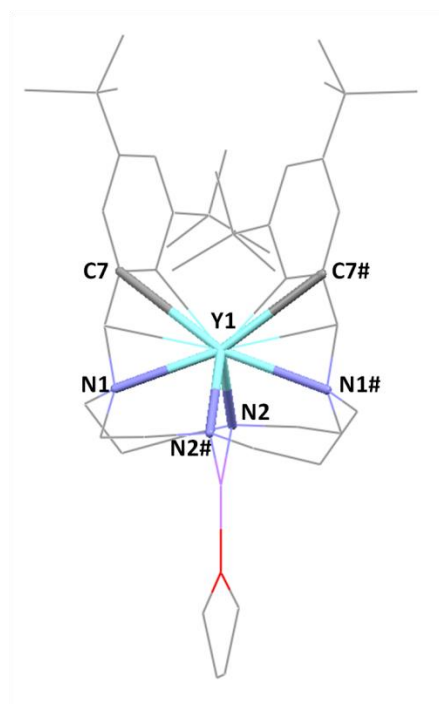

**Figure S6.** Illustration of the molecular structure of  $[\text{Y}\{(\eta^3\text{-}3,5\text{-tBu}_2\text{Bn})_2\text{Cyclam}\}\text{Li}(\text{THF})]$ , **6**, highlighting the coordination geometry around the metal center.

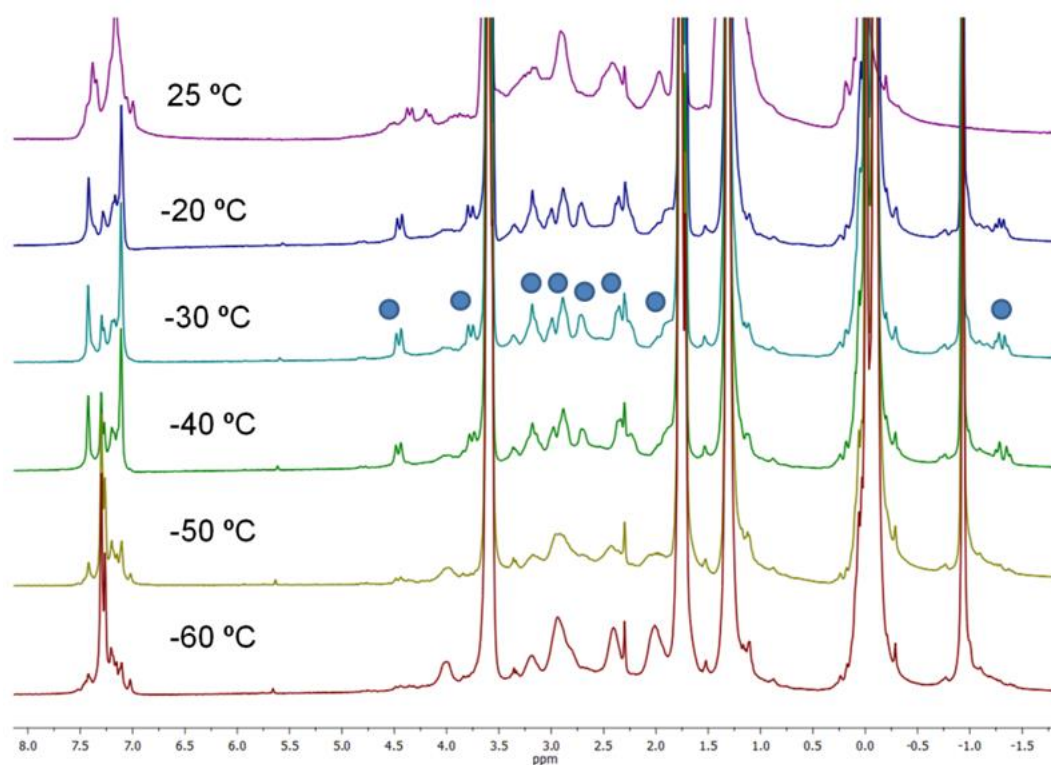

**Figure S7.** Variable temperature  $^1\text{H}$  NMR spectra of the reaction between  $\text{Y}(\text{CH}_2\text{SiMe}_3)_3(\text{THF})_2$  and **5** in  $\text{THF-}d_8$ . The blue dots identify a new  $\text{C}_2$ -symmetric species at  $-30\text{ }^\circ\text{C}$ .

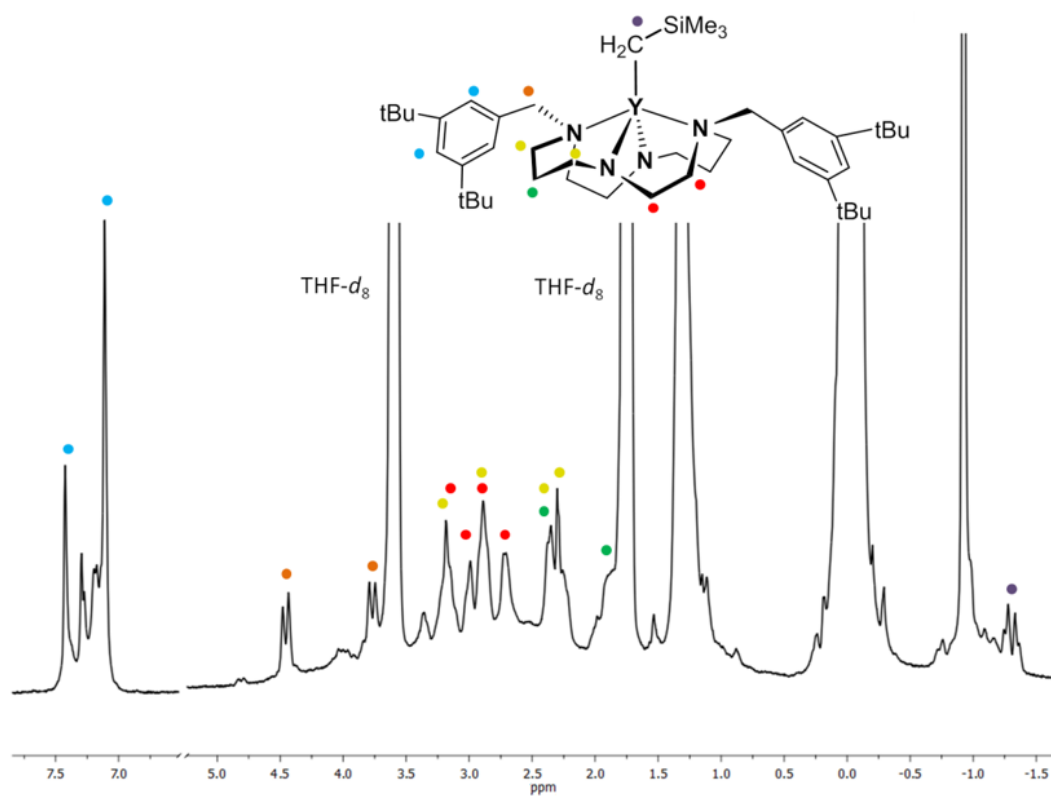

**Figure S8.**  $^1\text{H}$  NMR spectrum of  $[(^{3,5}\text{-tBu}_2\text{Bn}_2\text{Cyclam})\text{Y}(\text{CH}_2\text{SiMe}_3)]$ , **7**, at  $-30\text{ }^\circ\text{C}$  in  $\text{THF-}d_8$ . The corresponding protons are identified by the coloured dots.

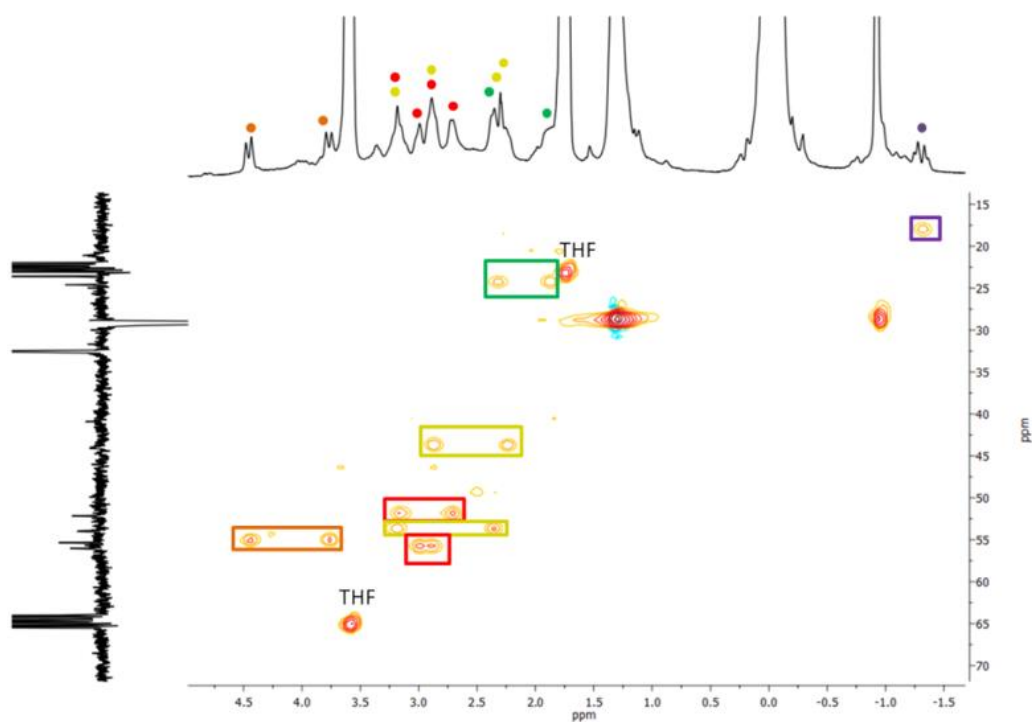

**Figure S9.**  $^1\text{H}$ - $^{13}\text{C}\{^1\text{H}\}$  HSQC NMR spectrum of  $[(^{3,5}\text{-tBu}_2\text{Bn}_2\text{Cyclam})\text{Y}(\text{CH}_2\text{SiMe}_3)]$ , **7**, at  $-30\text{ }^\circ\text{C}$  in  $\text{THF-}d_8$ . The corresponding protons are identified by the coloured dots.

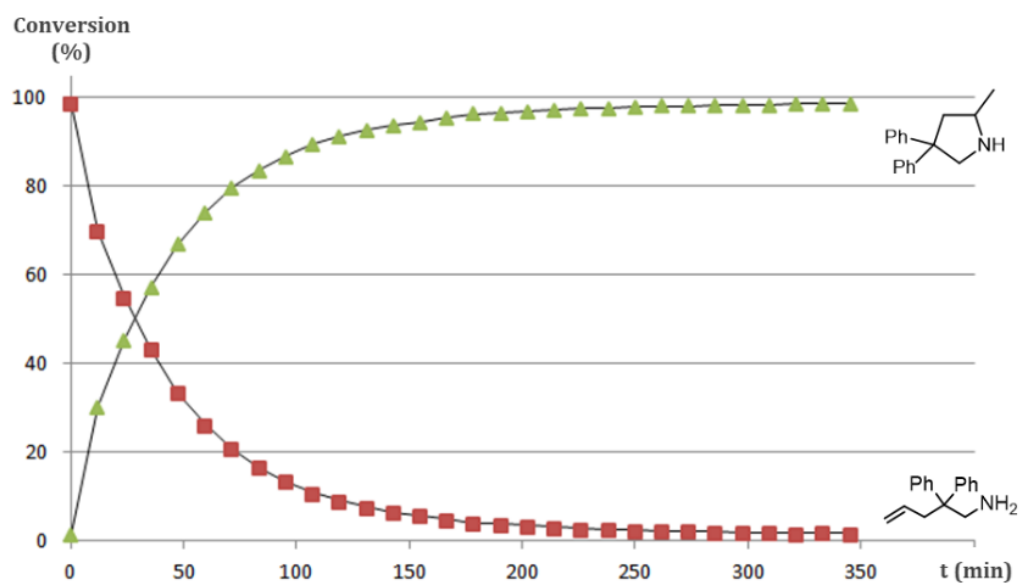

**Figure S10.** Cyclization kinetics of 2,2-diphenyl-pent-4-enylamine catalysed by **6** at room temperature.

**Table S1.** Crystal data and structure refinement for **2-4** and **6**.

|                                                        | <b>2</b>                                                         | <b>3</b>                                                          | <b>4</b>                                                            | <b>6</b>                                                         |
|--------------------------------------------------------|------------------------------------------------------------------|-------------------------------------------------------------------|---------------------------------------------------------------------|------------------------------------------------------------------|
| Formula                                                | C <sub>30</sub> H <sub>52</sub> N <sub>5</sub> Si <sub>2</sub> Y | C <sub>54</sub> H <sub>73</sub> BN <sub>5</sub> Si <sub>2</sub> Y | C <sub>40</sub> H <sub>65</sub> ClLiN <sub>4</sub> O <sub>4</sub> Y | C <sub>44</sub> H <sub>72</sub> LiN <sub>4</sub> OY              |
| $F_w$                                                  | 627.86                                                           | 948.07                                                            | 797.26                                                              | 768.91                                                           |
| Crystal system                                         | Triclinic                                                        | Triclinic                                                         | Triclinic                                                           | Monoclinic                                                       |
| Space group                                            | P-1                                                              | P-1                                                               | P-1                                                                 | I2/c                                                             |
| $a$ , Å                                                | 9.829(2)                                                         | 11.878(1)                                                         | 9.5832(8)                                                           | 17.5940(9)                                                       |
| $b$ , Å                                                | 10.537(2)                                                        | 16.334(2)                                                         | 12.368(1)                                                           | 16.562(1)                                                        |
| $c$ , Å                                                | 17.630(2)                                                        | 19.226(2)                                                         | 18.243(2)                                                           | 18.698(2)                                                        |
| $\alpha$ , °                                           | 100.138(6)                                                       | 104.917(5)                                                        | 78.965(5)                                                           | 90                                                               |
| $\beta$ , °                                            | 98.842(7)                                                        | 107.311(6)                                                        | 81.416(6)                                                           | 108.378(3)                                                       |
| $\gamma$ , °                                           | 110.746(6)                                                       | 105.236(5)                                                        | 73.368(5)                                                           | 90                                                               |
| $V$ , Å <sup>3</sup>                                   | 1633.9(6)                                                        | 3199.8(6)                                                         | 2023.2(3)                                                           | 5170.6(7)                                                        |
| $Z$                                                    | 2                                                                | 2                                                                 | 2                                                                   | 4                                                                |
| $D_c$ , g.cm <sup>-3</sup>                             | 1.276                                                            | 0.984                                                             | 1.309                                                               | 0.988                                                            |
| $\mu$ (Mo K $\alpha$ ), mm <sup>-1</sup>               | 1.885                                                            | 0.981                                                             | 1.551                                                               | 1.158                                                            |
| $F(000)$                                               | 668                                                              | 1008                                                              | 848                                                                 | 1656                                                             |
| Crystal size (mm)                                      | 0.06 x 0.20 x 0.20                                               | 0.10 x 0.20 x 0.20                                                | 0.20 x 0.20 x 0.20                                                  | 0.30 x 0.40 x 0.60                                               |
| $\theta$ range (°)                                     | 2.174 – 25.489                                                   | 1.191 – 25.485                                                    | 1.926 – 25.363                                                      | 1.682 – 25.839                                                   |
| Limiting indices                                       | -11 $\leq h \leq$ 11, -12 $\leq k \leq$ 12, -21 $\leq l \leq$ 21 | -14 $\leq h \leq$ 11, -19 $\leq k \leq$ 19, -20 $\leq l \leq$ 23  | -11 $\leq h \leq$ 11, -14 $\leq k \leq$ 14, -20 $\leq l \leq$ 21    | -21 $\leq h \leq$ 21, -20 $\leq k \leq$ 20, -22 $\leq l \leq$ 22 |
| Refl. collected/unique [ $R_{int}$ ]                   | 16337/6063 [0.0547]                                              | 31953/11915 [0.0694]                                              | 7955/7419 [0.0491]                                                  | 35938/5009 [0.0484]                                              |
| Completeness to $\theta$ (%)                           | 99.7                                                             | 99.6                                                              | 67.9                                                                | 100.0                                                            |
| Refinement method                                      | Full-matrix least squares on $F^2$                               | Full-matrix least squares on $F^2$                                | Full-matrix least squares on $F^2$                                  | Full-matrix least squares on $F^2$                               |
| Data/restraints/parameters                             | 6008/0/349                                                       | 11802/6/574                                                       | 5009/0/460                                                          | 4956/0/238                                                       |
| Goodness-of-fit on $F^2$                               | 0.997                                                            | 0.894                                                             | 0.929                                                               | 1.066                                                            |
| Final $R$ indices [ $I \geq 2\sigma(I)$ ] <sup>a</sup> | $R_1 = 0.0423$ , $wR_2 = 0.0798$                                 | $R_1 = 0.0592$ , $wR_2 = 0.1379$                                  | $R_1 = 0.0483$ , $wR_2 = 0.0878$                                    | $R_1 = 0.0329$ , $wR_2 = 0.0862$                                 |
| $R$ indices (all data) <sup>a</sup>                    | $R_1 = 0.0689$ , $wR_2 = 0.0849$                                 | $R_1 = 0.1042$ , $wR_2 = 0.1518$                                  | $R_1 = 0.0974$ , $wR_2 = 0.0990$                                    | $R_1 = 0.0388$ , $wR_2 = 0.0884$                                 |
| Absorption correction                                  | Multi-scan                                                       | Multi-scan                                                        | Multi-scan                                                          | Multi-scan                                                       |
| Largest diff. peak/hole (eÅ <sup>-3</sup> )            | 0.492 and -0.297                                                 | 0.697 and -0.462                                                  | 0.592 and -0.675                                                    | 0.351 and -0.419                                                 |

<sup>a</sup> $R_1 = \Sigma ||F_o| - |F_c|| / \Sigma |F_o|$ ;  $wR_2 = [\Sigma [w(F_o^2 - F_c^2)^2] / \Sigma [w(F_o^2)^2]]^{1/2}$ .
